# Supplementary material for: In Vivo Inhibition of TRPC6 by SH045 Attenuates Renal Fibrosis in a New Zealand Obese (NZO) Mouse Model of Metabolic Syndrome
Source: MDPI journal article supplement (doi:10.3390/ijms23126870), 2022-06-20
Supplement: s1 [file s1]

# ***In vivo* inhibition of TRPC6 by SH045 attenuates renal fibrosis in the New Zealand obese (NZO) mouse model of metabolic syndrome**

Zhihuang Zheng<sup>1,2,3</sup>, Yao Xu<sup>4</sup>, Ute Krügel<sup>5</sup>, Michael Schaefer<sup>5</sup>, Tilman Grune<sup>6,7</sup>, Bernd Nürnberg<sup>8</sup>, May-Britt Köhler<sup>2</sup>, Maik Gollasch<sup>1,4\*</sup>, Dmitry Tsvetkov<sup>4\*</sup> and Lajos Markó<sup>2,7,9,10\*</sup>

- <sup>1</sup> Department of Nephrology/Intensive Care, Charité - Universitätsmedizin, Corporate Member of Freie Universität Berlin, Humboldt-Universität zu Berlin, Berlin, Germany.
- <sup>2</sup> Experimental and Clinical Research Center, a cooperation of Charité - Universitätsmedizin Berlin and Max Delbrück Center for Molecular Medicine, Berlin, Germany.
- <sup>3</sup> Department of Nephrology, Shanghai General Hospital, Shanghai Jiaotong University School of Medicine, Shanghai, China.
- <sup>4</sup> Department of Geriatrics, University of Greifswald, University District Hospital Wolgast, Greifswald, Germany.
- <sup>5</sup> Rudolf Boehm Institute for Pharmacology and Toxicology, Leipzig University, Leipzig, Germany.
- <sup>6</sup> Department of Molecular Toxicology, German Institute of Human Nutrition Potsdam-Rehbruecke (DIfE), Nuthetal, Germany.
- <sup>7</sup> DZHK (German Centre for Cardiovascular Research), partner site Berlin, Germany.
- <sup>8</sup> Department of Pharmacology, Experimental Therapy and Toxicology and Interfaculty Center of Pharmacogenomics and Drug Research, University of Tübingen, Tübingen, Germany.
- <sup>9</sup> Berlin Institute of Health at Charité - Universitätsmedizin Berlin, Berlin, Germany.
- <sup>10</sup> Charité - Universitätsmedizin Berlin, Corporate Member of Freie Universität Berlin and Humboldt-Universität zu Berlin, Berlin, Germany.

\*The corresponding authors: M.G., maik.gollasch@med.uni-greifswald.de ; D.T., dmitry.tsvetkov@med.uni-greifswald.de; L.M., lajos.marko@charite.de .

**Figure S1**

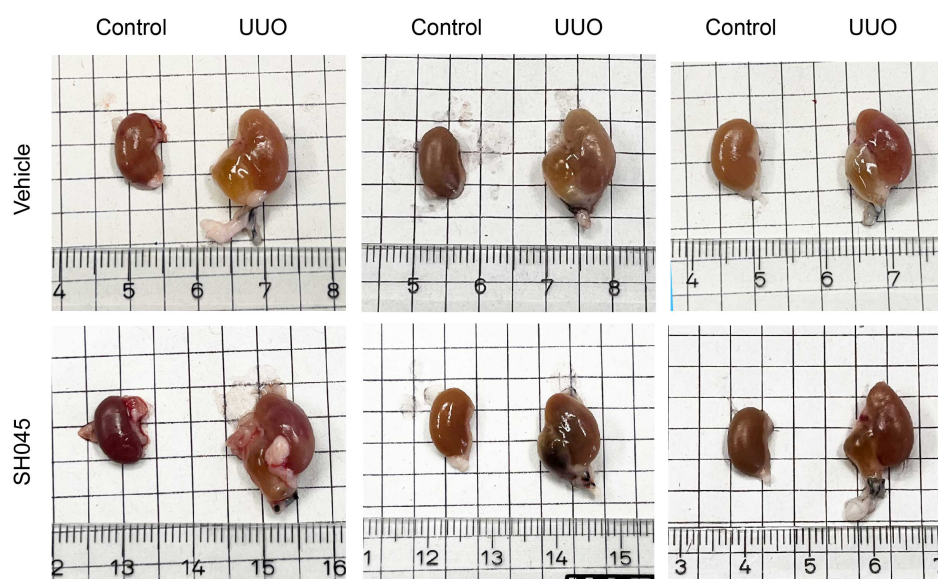

**Figure S1.** Macroscopic comparison of the kidneys. Images of control kidneys (left) and UUO kidneys (right). The UUO kidney increased in size (hydronephrosis) compared to control kidney. Scale bar: 1cm.

**Figure S2**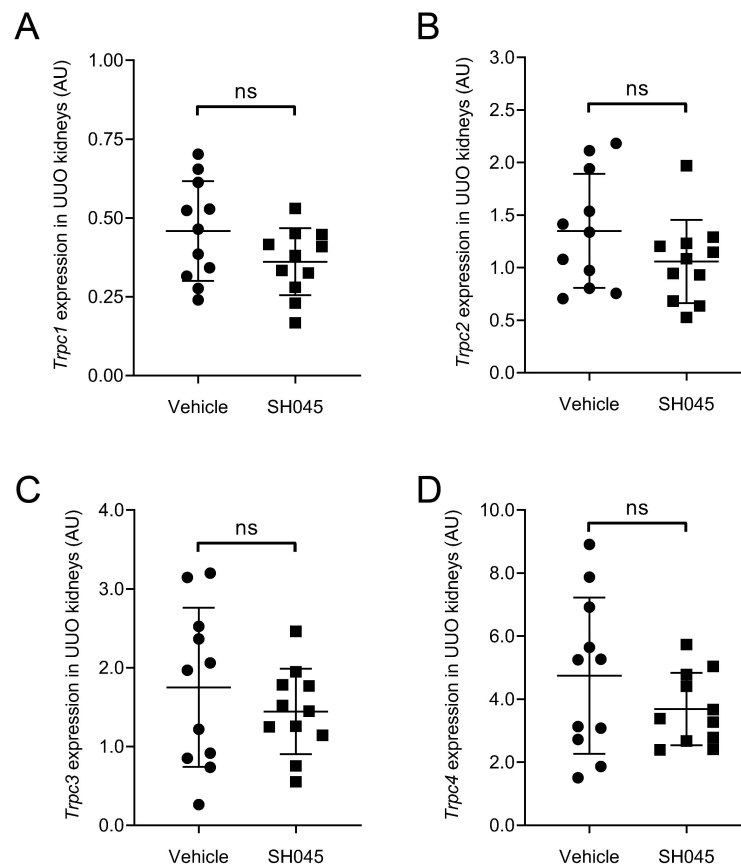

**Figure S2.** The impact of SH045 on renal *Trpc* gene expression in UUO kidneys. (A) Renal mRNA levels of *Trpc1*, (B) *Trpc2*, (C) *Trpc3*, and (D) *Trpc4* (n=11 each). Data expressed as means  $\pm$  SD. Two-way ANOVA followed by Sidak's multiple comparisons post hoc test. ns, not statistically significant. AU, arbitrary units.

**Figure S3**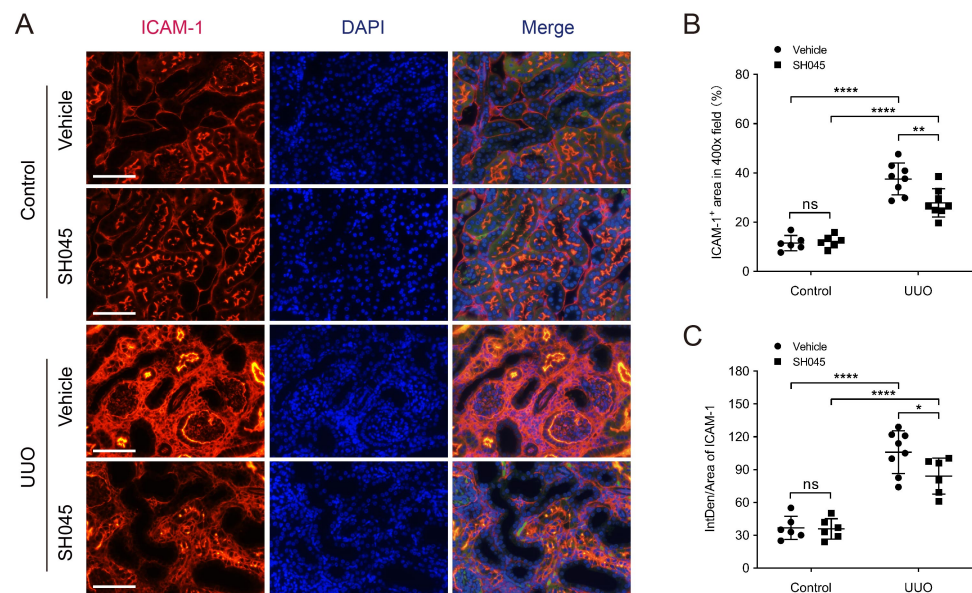

**Figure S3.** SH045 impact on renal ICAM-1 expression after UUO. (A) Renal immunofluorescence of ICAM-1. (B) Quantification of renal ICAM-1 expression in area proportion (Control n=6 each, UUO n=8 each, respectively). (C) Quantification of renal ICAM-1 expression in mean density (Control n=6 each, UUO n=8 each, respectively). Data expressed as means  $\pm$  SD. Two-way ANOVA followed by Sidak's multiple comparisons post hoc test. \* $p < 0.05$ , \*\* $p < 0.01$ , and \*\*\*\* $p < 0.0001$  defined as significant. ns, not statistically significant. IntDen, integrated density.

## Table S1

**Table S1.** SH045 impact on blood parameters in NZO-UUO mice. Blood parameters after 7-days UUO (n=9, 8 for UUO vehicle and UUO SH045, respectively). Data expressed as means  $\pm$  SD. Two-tailed unpaired t-test. n.a. = not applicable.

|                      |        | UUO+Vehicle |       | UUO+SH045 |       | p-value |
|----------------------|--------|-------------|-------|-----------|-------|---------|
| Serum parameter      | Unit   | Mean        | SD    | Mean      | SD    | t-test  |
| Sodium               | mmol/L | 147.30      | 1.25  | 146.88    | 2.17  | 0.608   |
| Potassium            | mmol/L | 4.57        | 0.30  | 4.49      | 0.78  | 0.760   |
| Chloride             | mmol/L | 109.40      | 1.17  | 110.75    | 1.49  | 0.047   |
| Ionized Calcium      | mmol/L | 1.38        | 0.20  | 1.33      | 0.05  | 0.563   |
| Total Carbon Dioxide | mmol/L | 27.20       | 1.40  | 26.44     | 1.81  | 0.320   |
| Glucose              | mg/dL  | 240.10      | 43.83 | 229.56    | 62.19 | 0.672   |
| Hematocrit           | % PCV  | 40.10       | 4.43  | 41.63     | 3.62  | 0.444   |
| Hemoglobin           | g/dL   | 13.63       | 1.51  | 14.16     | 1.22  | 0.432   |
| Anion Gap            | mmol/L | 16.40       | 2.27  | 15.25     | 1.28  | 0.221   |

## Table S2

**Table S2.** Primers used in qRT-PCR experiments.

| Primers                       | Forward                         | Reverse                         |
|-------------------------------|---------------------------------|---------------------------------|
| <i>Havcr1</i> (KIM-1)         | 5'-CTGGAGTAATCACACTGAAGCAATG-3' | 5'-GATGCCAACATAGAAGCCCTTAGT-3'  |
| <i>Lcn2</i> (NGAL)            | 5'-ATGTACACCTCCATCCTGGTCAG-3'   | 5'-GCCACTTGACATTGTAGCTCTG-3'    |
| <i>Trpc1</i>                  | 5'-CATCTAGCGATGAGCCTCTTGAC-3'   | 5'-CCAAACCGTGTTCAGGAAGTGC-3'    |
| <i>Trpc2</i>                  | 5'-AAGACTGCGGTTGGCTGTCAAC-3'    | 5'-GGCAACAAGAGCTTCCAGATGG-3'    |
| <i>Trpc3</i>                  | 5'-ATTCCTCGCCATCGGCTATTGG-3'    | 5'-GAGGCGTTGAATACAAGCAGACC-3'   |
| <i>Trpc4</i>                  | 5'-CTTGAACAGGCAAGGTCCACCA-3'    | 5'-TGTAATCCTGGAGTCCGCCATC-3'    |
| <i>Trpc6</i>                  | 5'-GACCGTTCATGAAGTTGTAGCAC-3'   | 5'-AGTAATCTTTGGGCGCTTGAAGTCC-3' |
| <i>Col1a1</i>                 | 5'-CATGTTGAGCTTTGTGGACCT-3'     | 5'-GCAGCTGACTTCAGGGATGT-3'      |
| <i>Col3a1</i>                 | 5'-CTCACCTTCTTCATCCCACTCTTA-3'  | 5'-ACATGGTTCTGGCTTCCAGACAT-3'   |
| <i>Col4a1</i>                 | 5'-TTAAAGGACTCCAGGACCAC-3'      | 5'-CCCCTGAGCCTGTACAC-3'         |
| <i>Acta2</i> ( $\alpha$ -SMA) | 5'-ACTGGGACGACATGGAAG-3'        | 5'-CATCTCCAGAGTCCAGCACA-3'      |
| <i>Ccn2</i> (CTGF)            | 5'-TGCGAAGCTGACCTGGAGGAAA-3'    | 5'-CCGCAGAACTTAGCCCTGTATG-3'    |
| <i>Fln1</i> (Fibronectin)     | 5'-CCCTATCTCTGATACCGTTGTCC-3'   | 5'-TGCCGCAACTACTGTGATTCGG-3'    |
| <i>Ccl2</i>                   | 5'-GCTACAAGAGGATCACCAGCAG-3'    | 5'-GTCTGGACCCATTCTTCTTGG-3'     |
| <i>Ccl5</i>                   | 5'-CCTGCTGCTTTGCCTACCTCTC-3'    | 5'-ACACACTTGGCGGTTCTTCGA-3'     |
| <i>Ccr2</i>                   | 5'-GCTGTGTTTGCCTCTTACCAG-3'     | 5'-CAAGTAGAGGCAGGATCAGGCT-3'    |
| <i>Cxcl1</i>                  | 5'-TCCAGAGCTTGAAGGTGTTGCC-3'    | 5'-AACCAAGGGAGCTTCAGGGTCA-3'    |
| <i>Cxcl2</i>                  | 5'-CATCCAGAGCTTGAGTGTGACG-3'    | 5'-GGCTTCAGGGTCAAGGCAAACT-3'    |
| <i>Icam1</i>                  | 5'-CTGGGCTGGAGACTCAGT-3'        | 5'-CCACACTCTCCGAAACGAA-3'       |
| <i>18S</i>                    | 5'-ACATCCAAGGAAGGCAGCAG-3'      | 5'-TTTTCGTCACTACCTCCCG-3'       |
